# Supplementary material for: A simple and versatile approach to self-healing polymers and electrically conductive composites
Source: Royal Society of Chemistry journal article supplement (doi:10.1039/c4ra16449k), 2015-01-01
Supplement: c4ra16449k1.pdf [file c4ra16449k1.pdf]

## Supporting Information

### **Simple and versatile approach to self-healing polymers and electrically conductive composites**

*Tingwan Xie<sup>‡</sup>, Huan Zhang<sup>‡</sup>, Yangju Lin, Yuanze Xu, Yonghong Ruan, Wengui Weng\* and Haiping Xia\**

Department of Chemistry, College of Chemistry and engineering, Xiamen University, Xiamen 361005, P. R. China

\*E-mail [wgweng@xmu.edu.cn](mailto:wgweng@xmu.edu.cn), [hpxia@xmu.edu.cn](mailto:hpxia@xmu.edu.cn)

## Table of Contents

|                                   |    |
|-----------------------------------|----|
| Testing conditions .....          | 3  |
| NMR and IR spectra .....          | 4  |
| Mechanical properties .....       | 8  |
| DMA test.....                     | 16 |
| Small angle X-ray scattering..... | 18 |
| Electrical properties .....       | 19 |
| SEM .....                         | 21 |

## Testing conditions

**NMR spectroscopy.**  $^1\text{H}$  NMR spectra of samples were recorded on a 400MHz Bruker Avance II 400 spectrometer at 25 °C using  $\text{CDCl}_3$  residual protonated solvent signals as internal standard.

**Small Angle X-ray Scattering (SAXS).** The synchrotron scattering experiments were operated at beamline BL16B1 at Shanghai Synchrotron Radiation Facility (SSRF). The beam energy and the current were 3.5 GeV and 150 mA, respectively. The wavelength  $\lambda_w$  of the X-ray was 0.124 nm and the magnitude of the scattering vector is defined as:  $q = 4\pi\sin\theta / \lambda_w$  where  $2\theta$  is the scattering angle. The raw sample to detector distance was about 5100 mm and further refined using a standard chicken tendon collagen sample (<http://www.rz.uni-karlsruhe.de/~cg02/korea.html>). A MarCCD detector was used to record 2D scattering patterns. Typical exposure time was 2 minutes. Due to the limitation of the setup at the beamline, parasitic scattering from the slits could be observed in the SAXS patterns close to the beamstop.

## NMR and IR spectra

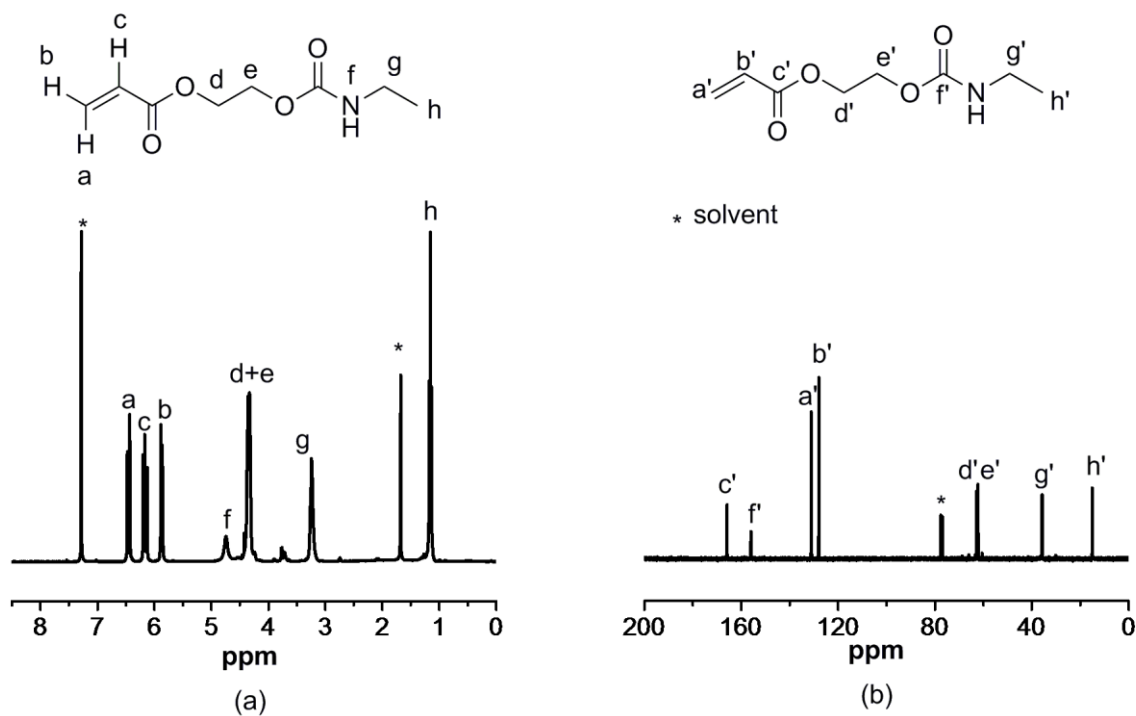

**Figure S1.** NMR spectra of CMA: (a)  $^1\text{H}$  NMR (400 MHz,  $\text{CDCl}_3$ ) and (b)  $^{13}\text{C}$  NMR (400 MHz,  $\text{CDCl}_3$ ).

$^1\text{H}$  NMR (400 MHz,  $\text{CDCl}_3$ ,  $\delta$ ): 6.43 (dd,  $J_{ac} = 17.32$  Hz,  $J_{ab} = 1.51$  Hz, 1 H,  $\text{H}_a$ ), 6.14 (dd,  $J_{ca} = 17.32$  Hz,  $J_{cb} = 10.43$  Hz, 1 H,  $\text{H}_c$ ), 5.85 (dd,  $J_{bc} = 10.43$  Hz,  $J_{ba} = 1.51$  Hz, 1 H,  $\text{H}_b$ ), 4.72 (s, 1H,  $\text{H}_f$ ), 4.32 (m, 4 H,  $\text{H}_{e+d}$ ), 3.22 (m, 2 H,  $\text{H}_g$ ), 1.10 (t, 3 H,  $J_{gh} = 7.22$  Hz,  $\text{H}_h$ )

$^{13}\text{C}$  NMR (400 MHz,  $\text{CDCl}_3$ ,  $\delta$ ): 165.6 ( $\text{C}_{c'}$ ), 155.8 ( $\text{C}_{f'}$ ), 130.9 ( $\text{C}_{a'}$ ), 127.7 ( $\text{C}_{b'}$ ), 62.5 ( $\text{C}_{d'}$ ), 62.0 ( $\text{C}_{e'}$ ), 35.5 ( $\text{C}_{g'}$ ), 14.8 ( $\text{C}_{h'}$ )

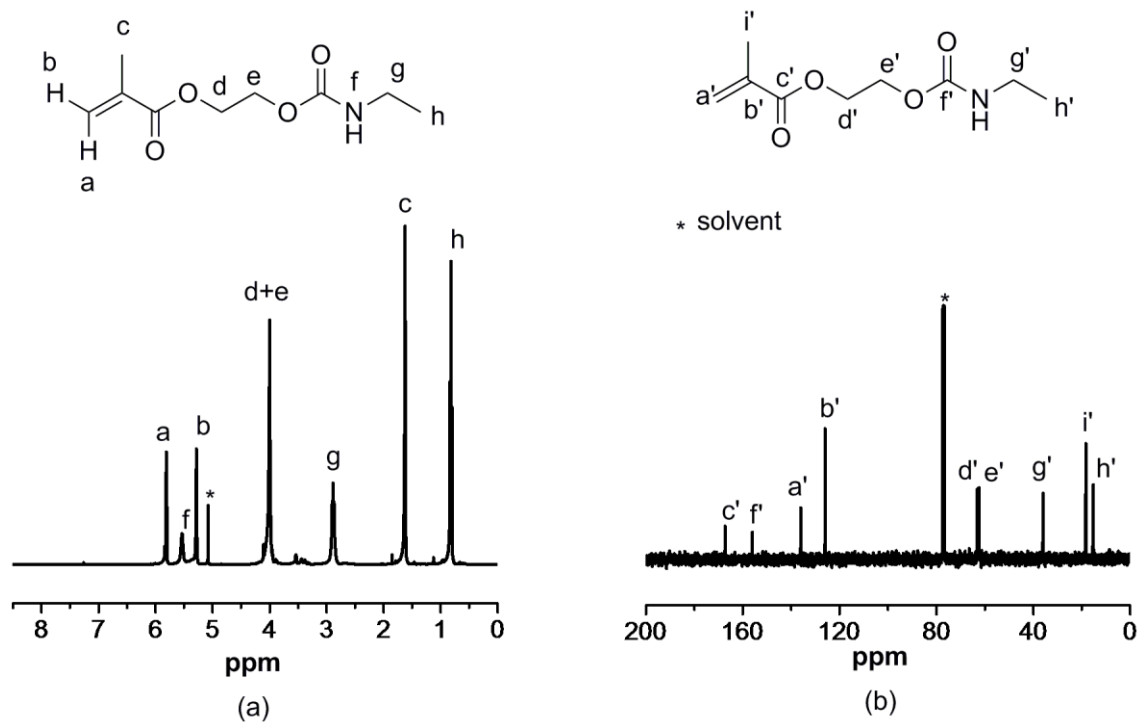

**Figure S2.** NMR spectra of MCMA: (a)  $^1\text{H}$  NMR (400 MHz,  $\text{CDCl}_3$ ) and (b)  $^{13}\text{C}$  NMR (400 MHz,  $\text{CDCl}_3$ ).

$^1\text{H}$  NMR (400 MHz,  $\text{CDCl}_3$ ,  $\delta$ ): 5.81 (s, 1 H,  $\text{H}_a$ ), 5.54 (s, 1 H,  $\text{H}_f$ ), 5.08 (s, 1 H,  $\text{H}_b$ ), 4.00 (m, 4 H,  $\text{H}_{d+e}$ ), 2.88 (m, 2 H,  $\text{H}_g$ ), 1.62 (m, 3 H,  $\text{H}_c$ ), 0.82 (t,  $J_{gh} = 7.20$  Hz, 3 H,  $\text{H}_h$ )

$^{13}\text{C}$  NMR (400 MHz,  $\text{CDCl}_3$ ,  $\delta$ ): 166.3 ( $\text{C}_{c'}$ ), 155.6 ( $\text{C}_{f'}$ ), 135.3 ( $\text{C}_{a'}$ ), 125.0 ( $\text{C}_{b'}$ ), 62.4 ( $\text{C}_{d'}$ ), 61.5 ( $\text{C}_{e'}$ ), 35.1 ( $\text{C}_{g'}$ ), 17.4 ( $\text{C}_{i'}$ ), 14.3 ( $\text{C}_{h'}$ )

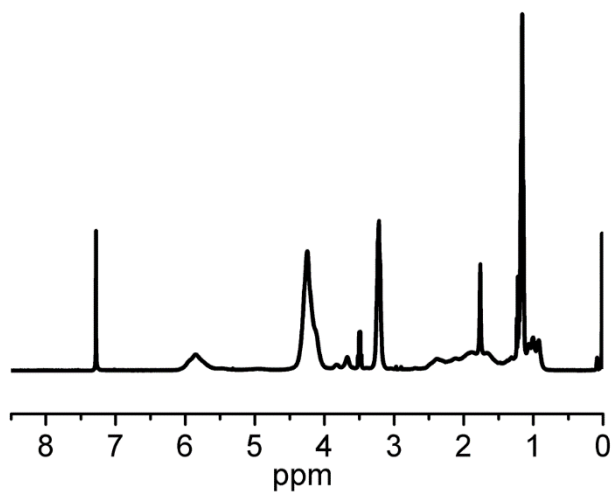

**Figure S3.** <sup>1</sup>H NMR (400 MHz, CDCl<sub>3</sub>) spectrum of **P40/60**.

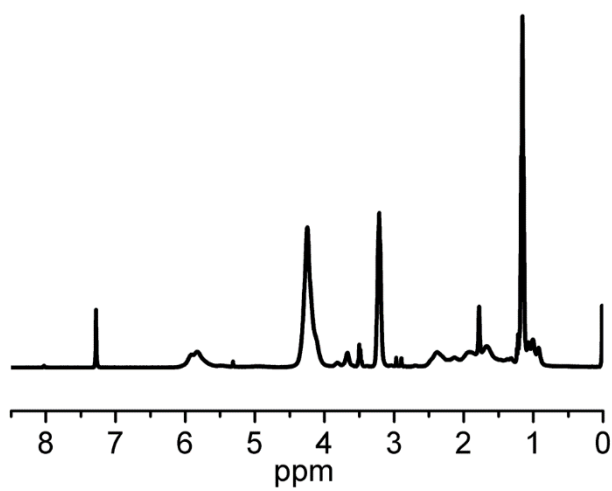

**Figure S4.** <sup>1</sup>H NMR (400 MHz, CDCl<sub>3</sub>) spectrum of **P30/70**.

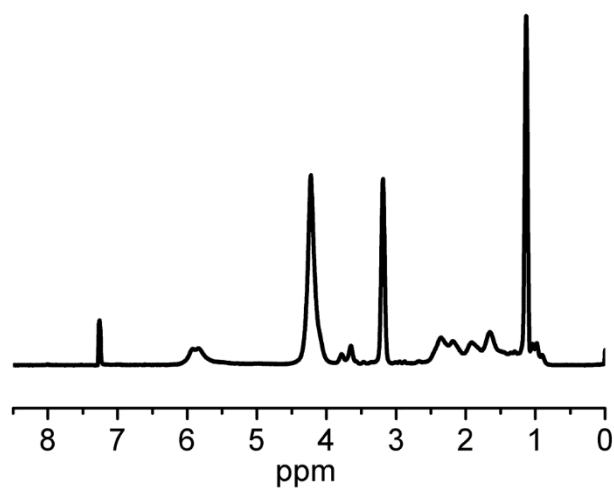

**Figure S5.**  $^1\text{H}$  NMR (400 MHz,  $\text{CDCl}_3$ ) spectrum of **P20/80**.

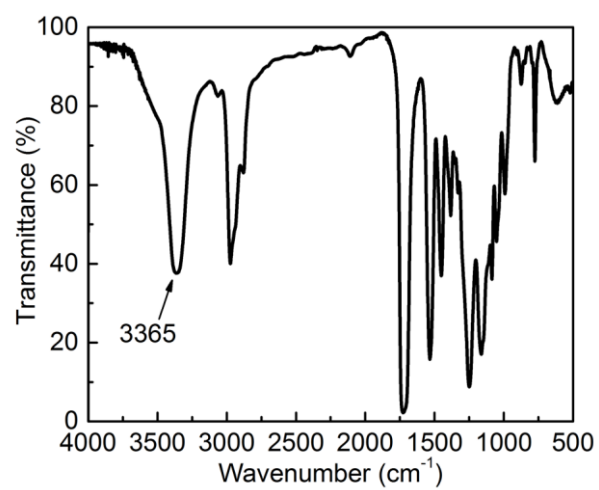

**Figure S6.** FTIR of **P20/80**.

## Mechanical properties

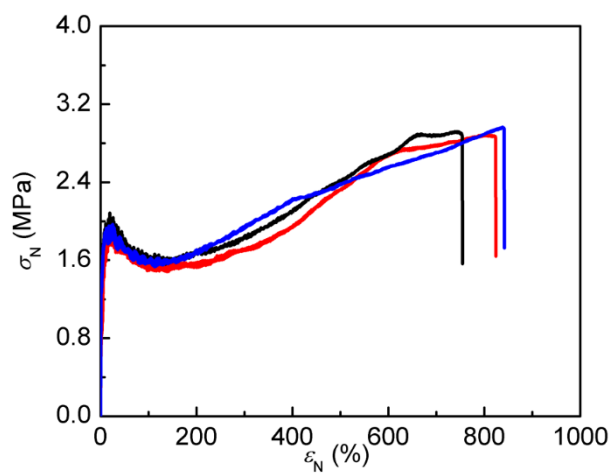

**Figure S7.** Monotonic stretching of **P20/80** under strain rate of  $0.05 \text{ s}^{-1}$  from three trials.

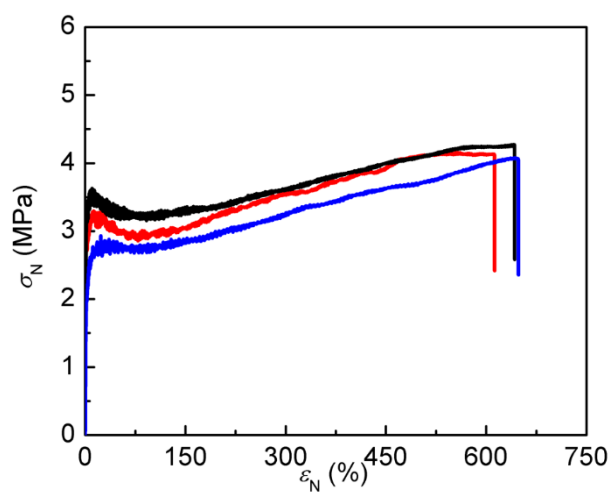

**Figure S8.** Monotonic stretching of **P20/80-CB5** under strain rate of  $0.05 \text{ s}^{-1}$  from three trials.



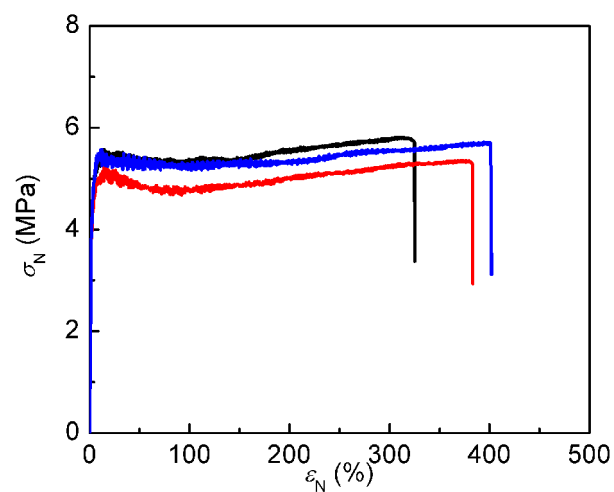

**Figure S9.** Monotonic stretching of **P20/80-CB10** under strain rate of  $0.05 \text{ s}^{-1}$  from three trials.

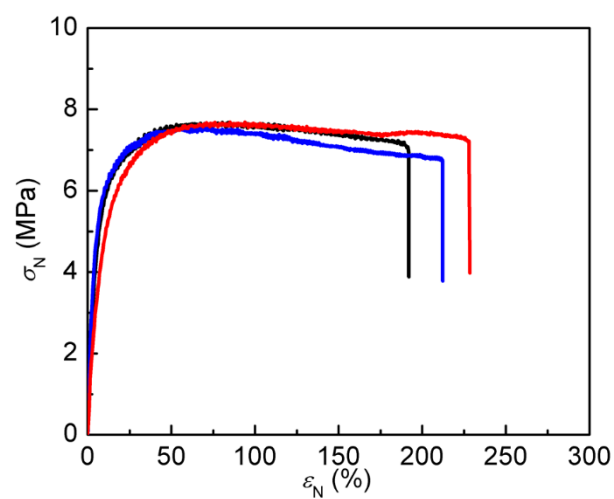

**Figure S10.** Monotonic stretching of **P20/80-CB20** under strain rate of  $0.05 \text{ s}^{-1}$  from three trials.

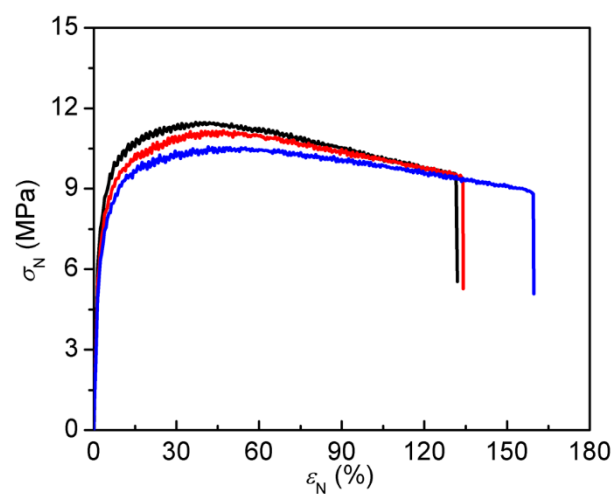

**Figure S11.** Monotonic stretching of **P20/80-CB25** under strain rate of  $0.05 \text{ s}^{-1}$  from three trials.

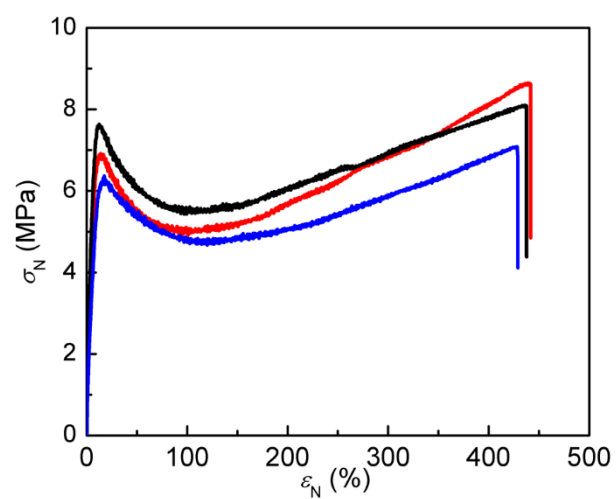

**Figure S12.** Monotonic stretching of **P30/70** under strain rate of  $0.05 \text{ s}^{-1}$  from three trials.

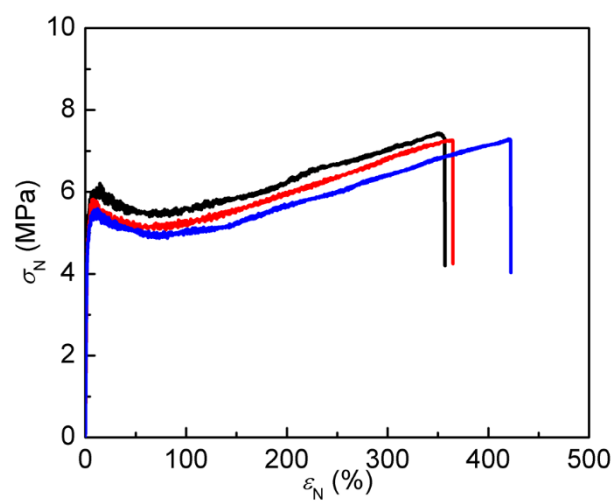

**Figure S13.** Monotonic stretching of **P30/70-CB5** under strain rate of  $0.05 \text{ s}^{-1}$  from three trials.

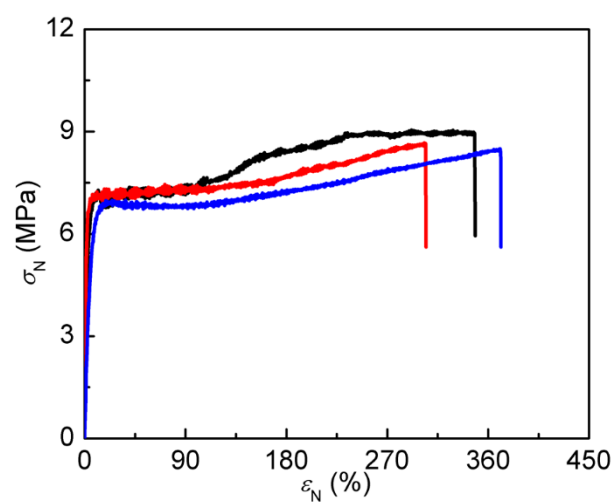

**Figure S14.** Monotonic stretching of **P30/70-CB10** under strain rate of  $0.05 \text{ s}^{-1}$  from three trials.

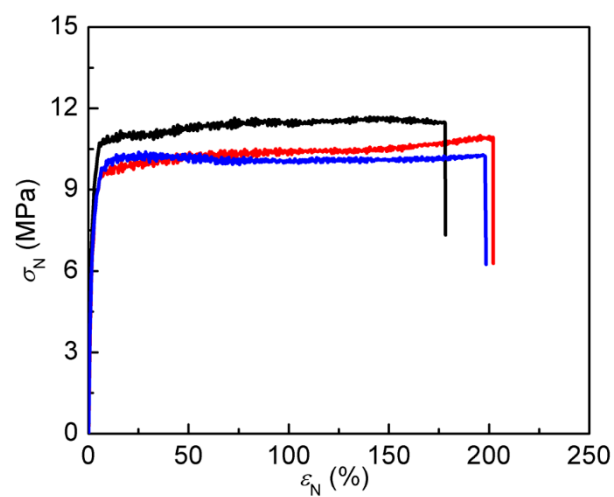

**Figure S15.** Monotonic stretching of **P30/70-CB20** under strain rate of  $0.05 \text{ s}^{-1}$  from three trials.

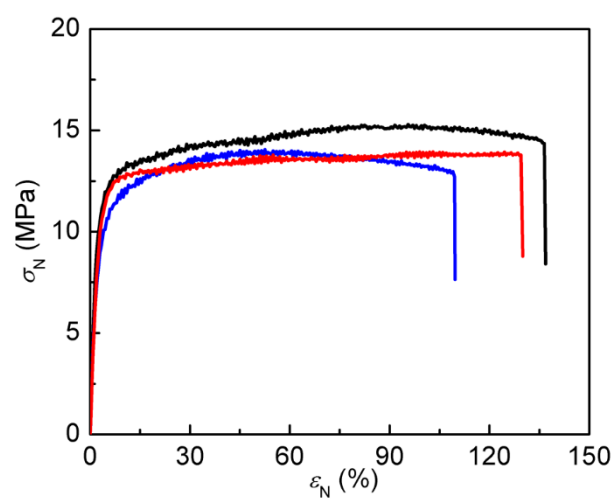

**Figure S16.** Monotonic stretching of **P30/70-CB25** under strain rate of  $0.05 \text{ s}^{-1}$  from three trials.

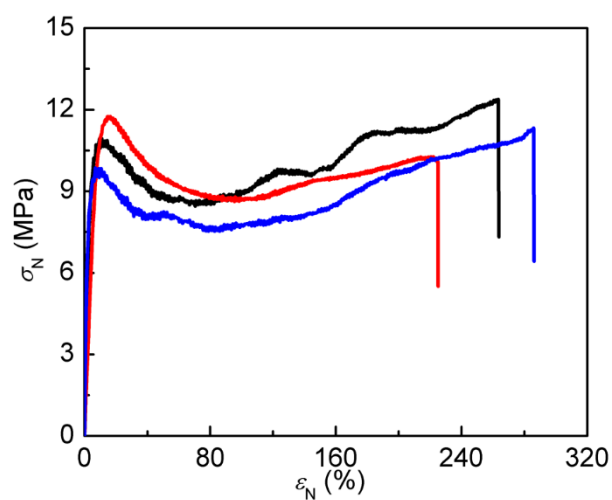

**Figure S17.** Monotonic stretching of **P40/60** under strain rate of  $0.05 \text{ s}^{-1}$  from three trials.

**Table S1.** Young's modulus, yield strength, strain at break, and strength at break for unfilled polymers.

| Sample        | Young's modulus(Mpa) | Yield Strength (Mpa) | Strain-at-break (%) | Stength-at-break (Mpa) |
|---------------|----------------------|----------------------|---------------------|------------------------|
| <b>P40/60</b> | $336.3 \pm 22.6$     | $10.8 \pm 0.9$       | $250 \pm 30$        | $11.3 \pm 1.1$         |
| <b>P30/70</b> | $122.5 \pm 13.5$     | $6.9 \pm 0.6$        | $435 \pm 10$        | $7.9 \pm 0.8$          |
| <b>P20/80</b> | $33.2 \pm 5.4$       | $2.0 \pm 0.1$        | $805 \pm 45$        | $2.9 \pm 0.1$          |

**Table S2. Young's modulus, yield strength, strain at break, and strength at break  
for filled P20/80.**

| Sample             | Young's<br>modulus(Mpa) | Yield Strength<br>(Mpa) | Strain-at-break<br>(%) | Stength-at-break<br>(Mpa) |
|--------------------|-------------------------|-------------------------|------------------------|---------------------------|
| <b>P20/80-CB25</b> | 330.6 ± 36.8            | 11.1 ± 0.1              | 135 ± 10               | 9.4 ± 0.1                 |
| <b>P20/80-CB20</b> | 185.7 ± 17.1            | 7.7 ± 0.4               | 210 ± 15               | 7.2 ± 0.4                 |
| <b>P20/80-CB10</b> | 117.4 ± 11.2            | 5.1 ± 0.5               | 370 ± 40               | 5.5 ± 0.2                 |
| <b>P20/80-CB5</b>  | 93.5 ± 9.3              | 3.2 ± 0.4               | 635 ± 20               | 4.1 ± 0.1                 |

**Table S3. Young's modulus, yield strength, strain at break, and strength at break  
for filled P30/70.**

| Sample             | Young's<br>modulus(Mpa) | Yield Strength<br>(Mpa) | Strain-at-break<br>(%) | Stength-at-break<br>(Mpa) |
|--------------------|-------------------------|-------------------------|------------------------|---------------------------|
| <b>P30/70-CB25</b> | 457.6 ± 13.9            | 13.1 ± 0.4              | 125 ± 15               | 13.6 ± 0.9                |
| <b>P30/70-CB20</b> | 353.1 ± 5.4             | 10.4 ± 0.3              | 190 ± 15               | 10.9 ± 0.6                |
| <b>P30/70-CB10</b> | 218.7 ± 10.8            | 6.9 ± 0.4               | 350 ± 30               | 8.4 ± 0.2                 |
| <b>P30/70-CB5</b>  | 209.4 ± 9.3             | 5.8 ± 0.3               | 380 ± 40               | 7.3 ± 0.1                 |

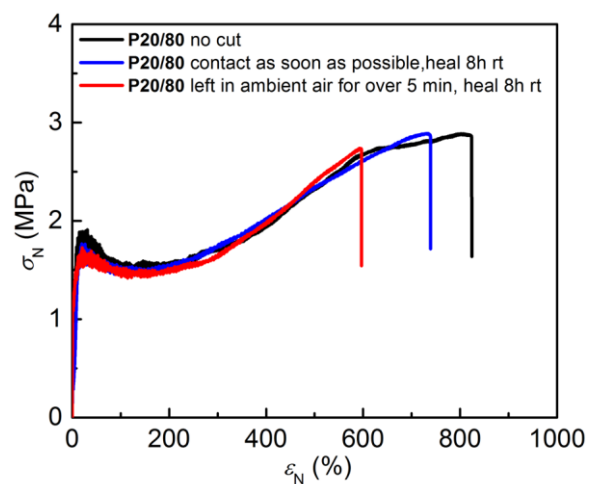

**Figure S18.** Self-healing of **P20/80** under various conditions indicated in the legend.

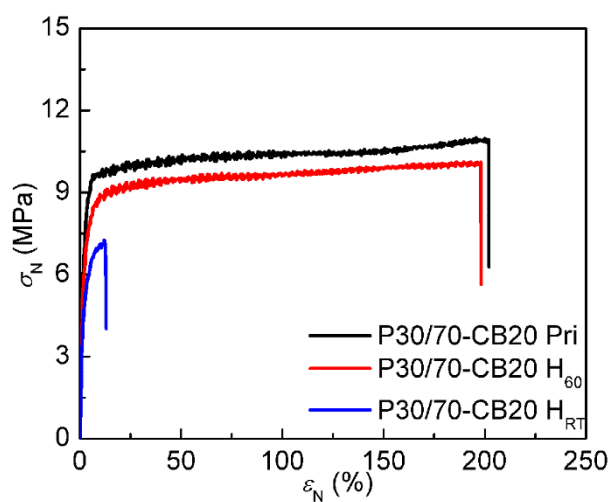

**Figure S19.** Typical stress-strain curves of **P30/70-CB20**. Pri: pristine sample (black line). H<sub>60</sub>: healed at elevated temperature (60 °C) for 1 h (red line). H<sub>RT</sub>: healed at room temperature for 24 h (blue line).

## DMA test

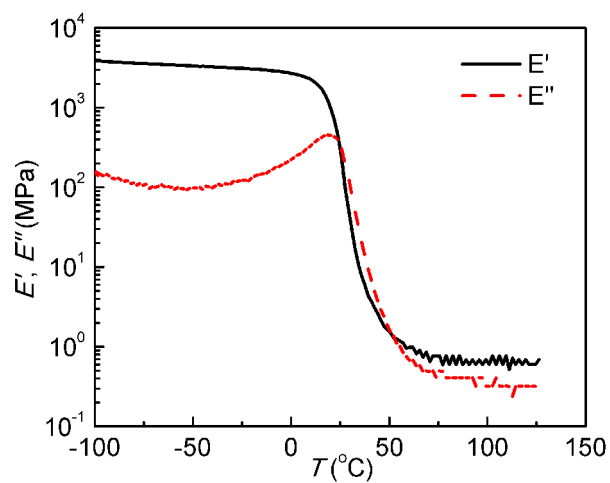

**Figure S20.** Young's modulus  $E'$  and  $E''$  as a function of temperature  $T$  for **P20/80**.

Heating rate  $5\text{ }^{\circ}\text{C min}^{-1}$ . Frequency  $f = 1\text{ Hz}$ .

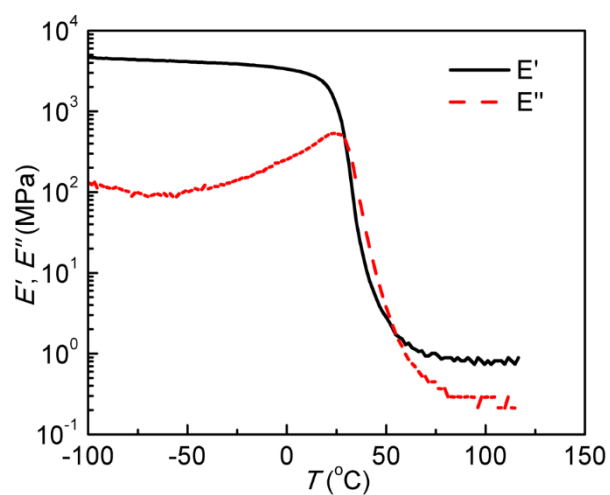

**Figure S21.** Young's modulus  $E'$  and  $E''$  as a function of temperature  $T$  for **P30/70**.

Heating rate  $5\text{ }^{\circ}\text{C min}^{-1}$ . Frequency  $f = 1\text{ Hz}$ .



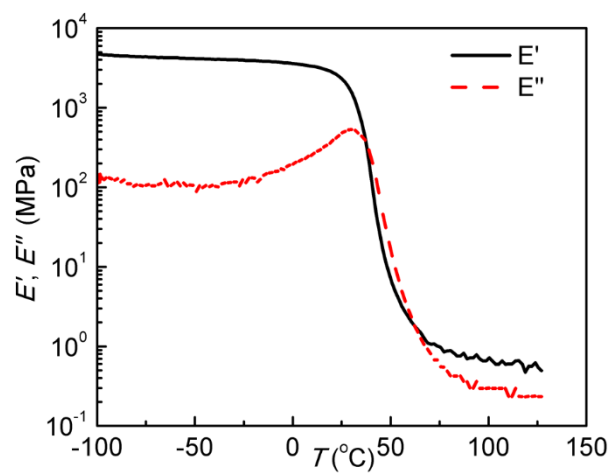

**Figure S22.** Young's modulus  $E'$  and  $E''$  as a function of temperature  $T$  for **P40/60**.

Heating rate  $5\text{ }^{\circ}\text{C min}^{-1}$ . Frequency  $f = 1\text{ Hz}$ .

### Small angle X-ray scattering

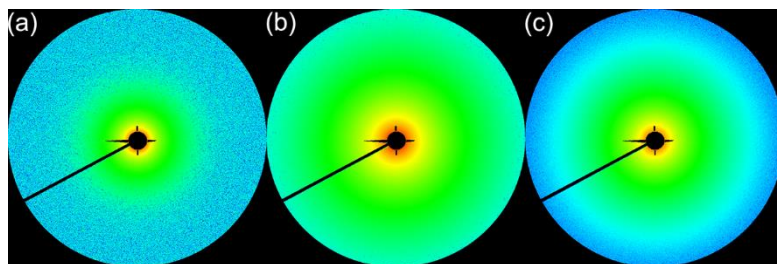

**Figure S23.** 2D SAXS of (a) **P20/80** (b) **P30/70** (c) **P40/60**. Synchrotron X-ray source.

## Electrical properties

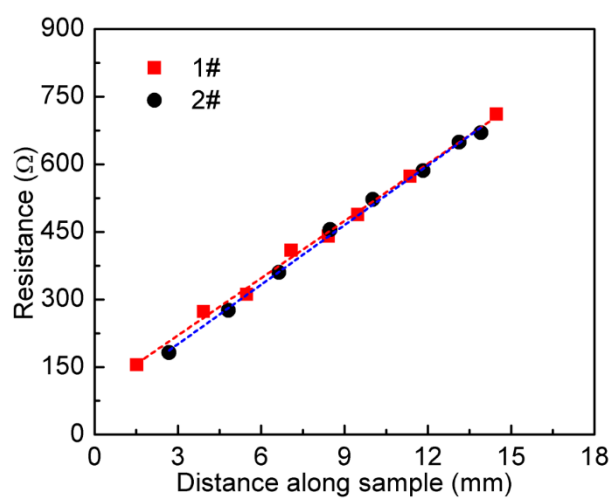

**Figure S24** Resistance of **P20/80-CB20** as a function of the distance along the sample.

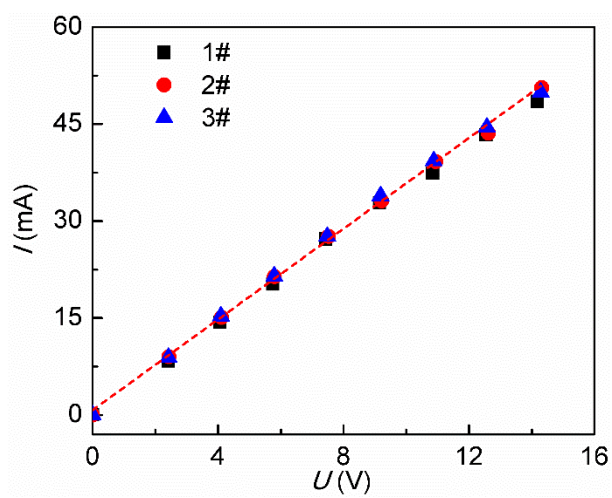

**Figure S25.** The  $I$ - $U$  curve of a **P20/80-CB20** sample.

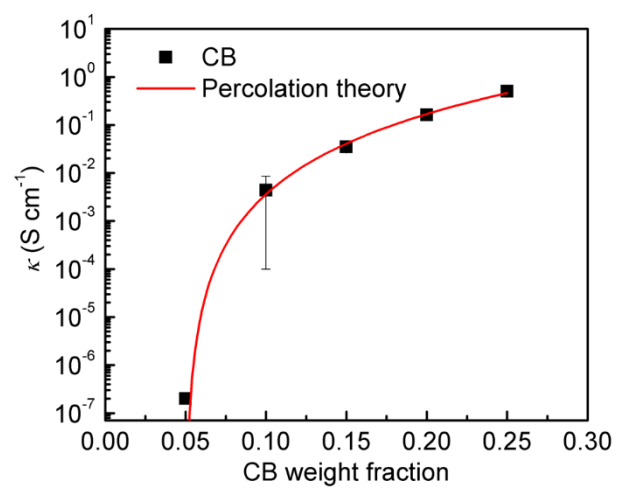

**Figure S26.** Conductivity as a function of filler weight fraction for **P30/70** materials.

**SEM**

| <div>Polymer</div> <div>CB %</div> |  | (a) P20/80                                                                                   | (b) P30/70                                                                                    |
|------------------------------------|--|----------------------------------------------------------------------------------------------|-----------------------------------------------------------------------------------------------|
| CB 25                              |  | 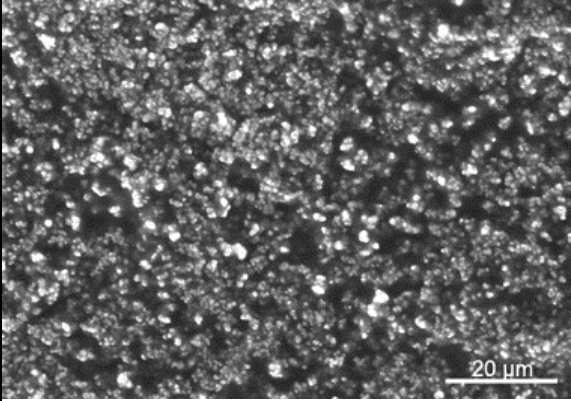<br>20 μm   | <br>20 μm   |
|                                    |  | <br>20 μm  | <br>20 μm  |
|                                    |  | <br>20 μm | <br>20 μm |
|                                    |  | <br>20 μm | <br>20 μm |

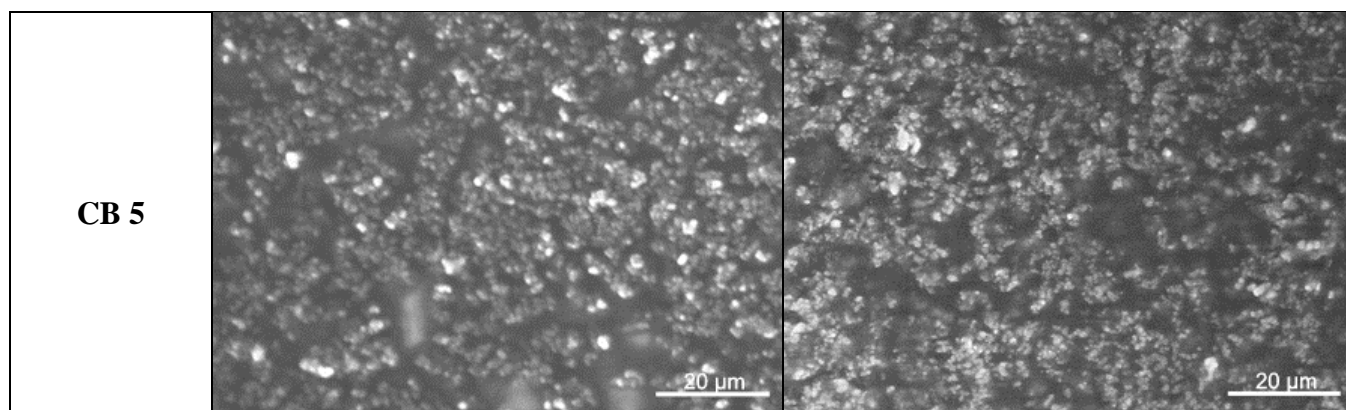

**Figure S27** (a): SEM images of the cross-section for **P20/80-CB 25, P20/80-CB 20, P20/80-CB 15, P20/80-CB 10, P20/80-CB 5** samples. (b): SEM images of the cross-section for **P30/70-CB 25, P30/70-CB 20, P30/70-CB 15, P30/70-CB 10, P30/70-CB 5** samples.
